# Supplementary material for: Neonatal Sepsis, Antibiotic Susceptibility Pattern, and Treatment Outcomes among Neonates Treated in Two Tertiary Care Hospitals of Yangon, Myanmar from 2017 to 2019
Source: MDPI journal article supplement (doi:10.3390/tropicalmed6020062), 2021-04-27
Supplement: s1 [file s1]

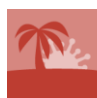

# Supplementary Materials of Neonatal Sepsis, Antibiotic Susceptibility Pattern and Treatment Outcomes among Neonates Treated in Two Tertiary Care Hospitals of Yangon, Myanmar from 2017 to 2019

**Table 1.** Distribution of all bacteria isolates from positive blood culture (n= 672).

| Isolated bacteria                     | Total | (%)    |
|---------------------------------------|-------|--------|
| CoNS (others)                         | 115   | (17.1) |
| <i>Klebsiella pneumoniae</i>          | 90    | (13.4) |
| <i>S. aureus</i>                      | 73    | (10.9) |
| <i>Serratia marcescens</i>            | 66    | (9.8)  |
| Other gram negative bacilli           | 11    | (1.6)  |
| <i>Enterobacter</i> spp.              | 36    | (5.4)  |
| <i>S. epidermidis</i> (CoNS)          | 34    | (5.1)  |
| <i>Burkholderia cepacia</i>           | 33    | (4.9)  |
| <i>Pseudomonas aeruginosa</i>         | 33    | (4.9)  |
| <i>Acinetobacter baumannii</i>        | 29    | (4.3)  |
| <i>E.coli</i>                         | 29    | (4.3)  |
| <i>Klebsiella</i> spp.                | 18    | (2.7)  |
| <i>Serratia</i> spp.                  | 16    | (2.4)  |
| <i>Citrobacter</i> spp.               | 16    | (2.4)  |
| <i>Enterococcus</i> spp.              | 13    | (1.9)  |
| <i>Acinobacter</i> spp.               | 11    | (1.6)  |
| <i>Streptococcus</i> spp.             | 8     | (1.2)  |
| Others Gram positive                  | 8     | (1.2)  |
| <i>Pantoea</i> spp.                   | 5     | (0.7)  |
| <i>Coliform</i> spp.                  | 6     | (0.9)  |
| <i>Aeromonas</i> spp.                 | 4     | (0.6)  |
| <i>Proteus mirabilis</i>              | 4     | (0.6)  |
| <i>Pseudomonas</i> spp.               | 5     | (0.7)  |
| <i>Kluyvera cryocrescens</i>          | 4     | (0.6)  |
| <i>Elizabethkingia meningoseptica</i> | 3     | (0.4)  |
| <i>Stenotrophomonas maltophilia</i>   | 2     | (0.3)  |
| Total                                 | 672   | (100)  |

**Table 2.** Bacteriological profile found in positive blood culture (n = 672) from neonate with early and late onset sepsis.

| Isolated bacteria             | EOS, (number, %)  | LOS, (number, %)  | Total      |
|-------------------------------|-------------------|-------------------|------------|
| <b>Gram-positive isolates</b> | <b>117 (46.6)</b> | <b>134 (53.4)</b> | <b>251</b> |
| <i>S. aureus</i>              | 37 (50.7)         | 36 (49.3)         | 73         |
| <i>S epidermidis</i>          | 10 (29.4)         | 24 (70.6)         | 34         |
| CoNS (others)                 | 56 (48.7)         | 59 (51.3)         | 115        |
| <i>Enterococcus</i> spp.      | 7 (53.8)          | 6 (46.2)          | 13         |
| <i>Streptococcus</i> spp.     | 3 (50.7)          | 5 (62.5)          | 8          |
| Others gram-positive isolates | 4 (50.0)          | 4 (50.0)          | 8          |
| <b>Gram-negative isolates</b> | <b>177 (42.0)</b> | <b>244 (58.0)</b> | <b>421</b> |

|                                 |                   |                   |            |
|---------------------------------|-------------------|-------------------|------------|
| <i>Klebsiella pneumoniae</i>    | 35 (38.9)         | 55 (61.1)         | 90         |
| <i>Serratia mercencus</i>       | 28 (50.7)         | 38 (57.6)         | 66         |
| Other <i>Serratia</i> spp.      | 10 (62.5)         | 6 (37.5)          | 16         |
| <i>Burkholderia cepacia</i>     | 12 (36.4)         | 21 (63.6)         | 33         |
| <i>Pseudomonas aeruginosa</i>   | 19 (57.6)         | 14 (42.4)         | 33         |
| <i>Acinetobacter baumannii</i>  | 5 (50.7)          | 24 (50.7)         | 29         |
| <i>Enterobacter</i> spp.        | 18 (50.0)         | 18 (50.0)         | 36         |
| <i>Citrobacter</i> spp.         | 11 (68.8)         | 5 (31.3)          | 16         |
| Other gram-negative bacilli     | 15 (43.1)         | 29 (65.9)         | 44         |
| <i>E.coli</i>                   | 10 (34.5)         | 19 (65.5)         | 29         |
| Other <i>Acinetobacter</i> spp. | 4 (36.4)          | 7 (63.6)          | 11         |
| Other <i>Klebsiella</i> spp.    | 10 (55.6)         | 8 (44.4)          | 18         |
| <b>Total</b>                    | <b>294 (43.7)</b> | <b>378 (56.3)</b> | <b>672</b> |

**Table 3.** Demographic, perinatal and clinical characteristics associated with culture positive bacteriological sepsis among neonates with clinically suspected sepsis admitted to the NICU of two tertiary care hospitals in Yangon, Myanmar from January 2017 to December 2019, N= 1615.

| Characteristics          | Total | Culture positive |        | Unadjusted |           | Adjusted# |           | p Value |
|--------------------------|-------|------------------|--------|------------|-----------|-----------|-----------|---------|
|                          |       | n                | (%)*   | PR         | (95% CI)  | PR        | (95% CI)  |         |
| Total                    | 1615  | 672              | (41.6) |            |           |           |           |         |
| <b>Age in days</b>       |       |                  |        |            |           |           |           |         |
| ≤ 3                      | 1160  | 492              | (42.4) | 1.0        |           | 1.0       |           |         |
| 4-7                      | 179   | 77               | (43.0) | 1.0        | (0.8-1.2) | 1.0       | (0.8-1.2) | 0.975   |
| 8-28                     | 276   | 103              | (37.3) | 0.9        | (0.8-1.0) | 0.9       | (0.7-1.1) | 0.220   |
| <b>Gender</b>            |       |                  |        |            |           |           |           |         |
| Male                     | 946   | 392              | (41.4) | 1.0        |           |           |           |         |
| Female                   | 669   | 280              | (41.9) | 1.0        | (0.9-1.1) |           |           |         |
| <b>Hospital admitted</b> |       |                  |        |            |           |           |           |         |
| YCH                      | 990   | 413              | (41.7) | 1.0        | (0.9-1.1) |           |           |         |
| CWH                      | 625   | 259              | (41.4) | 1.0        |           |           |           |         |
| <b>Year of admission</b> |       |                  |        |            |           |           |           |         |
| 2017                     | 685   | 295              | (43.1) | 1.4        | (1.2-1.7) | 1.4       | (1.2-1.7) | <0.001  |
| 2018                     | 497   | 245              | (49.3) | 1.6        | (1.4-1.9) | 1.5       | (1.3-1.8) | <0.001  |
| 2019                     | 433   | 132              | (30.5) | 1.0        |           | 1.0       |           |         |
| <b>Gestational age</b>   |       |                  |        |            |           |           |           |         |
| Preterm (<37 wk )        | 789   | 392              | (49.7) | 1.5        | (1.3-1.7) | 1.2       | (1.0-1.5) | 0.094   |
| Term (37 up to 42 wk )   | 797   | 267              | (33.5) | 1.0        |           | 1.0       |           |         |
| Post term (>42 wk )      | 10    | 5                | (50.0) | 1.5        | (0.8-2.7) | 1.5       | (0.9-2.7) | 0.128   |
| Missing                  | 19    | 8                | (42.1) | 1.3        | (0.7-2.1) | 1.1       | (0.6-1.9) | 0.818   |
| <b>PROM (&gt;18hr)</b>   |       |                  |        |            |           |           |           |         |
| Yes                      | 429   | 196              | (45.7) | 1.1        | (1.0-1.3) | 1.0       | (0.9-1.1) | 0.978   |
| No                       | 1186  | 476              | (40.1) | 1.0        |           | 1.0       |           |         |
| <b>Place of Delivery</b> |       |                  |        |            |           |           |           |         |

|                                               |      |     |        |     |           |     |           |       |
|-----------------------------------------------|------|-----|--------|-----|-----------|-----|-----------|-------|
| Institutional                                 | 1398 | 584 | (41.8) | 1.0 | (0.9-1.2) |     |           |       |
| Home                                          | 217  | 88  | (40.6) | 1.0 |           |     |           |       |
| <b>Mode of delivery</b>                       |      |     |        |     |           |     |           |       |
| Normal                                        | 821  | 313 | (38.1) | 1.0 |           | 1.0 |           |       |
| Forceps/Vacuum                                | 32   | 10  | (31.3) | 0.8 | (0.5-1.4) | 1.1 | (0.6-1.9) | 0.777 |
| Elective CS                                   | 70   | 28  | (40.0) | 1.0 | (0.8-1.4) | 1.1 | (0.8-1.5) | 0.434 |
| Emergency CS                                  | 692  | 321 | (46.4) | 1.2 | (1.1-1.4) | 1.2 | (1.1-1.4) | 0.001 |
| <b>Delivery conducted by</b>                  |      |     |        |     |           |     |           |       |
| Doctor                                        | 1347 | 567 | (42.1) | 1.1 | (0.9-1.3) |     |           |       |
| Others <sup>#</sup>                           | 268  | 105 | (39.2) | 1.0 |           |     |           |       |
| <b>Meconium staining liquor</b>               |      |     |        |     |           |     |           |       |
| Yes                                           | 204  | 61  | (29.9) | 1.0 |           | 1.0 |           |       |
| No                                            | 1411 | 611 | (43.3) | 1.4 | (1.2-1.8) | 1.2 | (0.9-1.5) | 0.166 |
| <b>Foul smelling liquor</b>                   |      |     |        |     |           |     |           |       |
| Yes                                           | 86   | 38  | (44.2) | 1.1 | (0.8-1.4) |     |           |       |
| No                                            | 1529 | 634 | (41.5) | 1.0 |           |     |           |       |
| <b>Birth Asphyxia</b>                         |      |     |        |     |           |     |           |       |
| Yes                                           | 393  | 140 | (35.6) | 1.0 |           | 1.0 |           |       |
| No                                            | 1150 | 500 | (43.5) | 1.2 | (1.1-1.4) | 1.2 | (1.0-1.4) | 0.010 |
| Missing                                       | 72   | 32  | (44.4) | 1.2 | (0.9-1.7) | 1.3 | (1.0-1.7) | 0.062 |
| <b>Birth weight</b>                           |      |     |        |     |           |     |           |       |
| Very low (<1.5kg)                             | 379  | 205 | (54.1) | 1.6 | (1.4-1.8) | 1.2 | (1.0-1.6) | 0.073 |
| Low (1.5 to 2.5kg)                            | 512  | 223 | (43.6) | 1.3 | (1.1-1.5) | 1.1 | (0.9-1.3) | 0.544 |
| Normal (>2.5kg)                               | 724  | 244 | (33.7) | 1.0 |           | 1.0 |           |       |
| <b>Hyperbilirubinemia (&gt; 20 mg per dL)</b> |      |     |        |     |           |     |           |       |
| Yes                                           | 870  | 368 | (42.3) | 1.0 | (0.9-1.2) |     |           |       |
| No                                            | 745  | 304 | (40.8) | 1.0 |           |     |           |       |
| <b>Hypothermia (&lt;37.5 °C)</b>              |      |     |        |     |           |     |           |       |
| Yes                                           | 266  | 120 | (45.1) | 1.1 | (1.0-1.3) | 1.1 | (1.0-1.3) | 0.141 |
| No                                            | 1349 | 552 | (40.9) | 1.0 |           | 1.0 |           |       |
| <b>Onset</b>                                  |      |     |        |     |           |     |           |       |
| Early                                         | 779  | 294 | (37.7) | 1.0 |           | 1.0 |           |       |
| Late                                          | 836  | 378 | (45.2) | 1.2 | (1.1-1.3) | 1.2 | (1.1-1.4) | 0.008 |

YCH= Yangon Children Hospital; CWH= Central Women Hospital; NICU= Neonatal intensive care unit; PR- Prevalence ratio; CI- Confidence interval; PROM= Prolonged rupture of membrane; Birth Asphyxia= (For extramural/outborn babies, YCH): Slow gasping breathing at 1-minute of age and (For intramural/inborn babies, CWH): Apgar score of less than 7 at 1 minute of age; Other<sup>#</sup>= Nurse, Midwife, Traditional Birth Attendant, Skilled Birth Attendant and Self; \* Row percentage; # Modified Poisson regression.

**Table 4.** Demographic, perinatal and clinical characteristics associated with resistance to at least one first-line antibiotic among neonates with confirmed sepsis admitted to the NICU of two tertiary care hospitals in Yangon, Myanmar, January 2017 to December 2019.

| Characteristics | Total | Resistance* | Unadjusted |          | Adjusted <sup>s</sup> |          | p Value |
|-----------------|-------|-------------|------------|----------|-----------------------|----------|---------|
|                 | n     | (%)*        | PR         | (95% CI) | PR                    | (95% CI) |         |

|                                 |            |            |               |     |           |     |           |        |
|---------------------------------|------------|------------|---------------|-----|-----------|-----|-----------|--------|
| <b>Total</b>                    | <b>672</b> | <b>496</b> | <b>(73.8)</b> |     |           |     |           |        |
| <b>Admission age in days</b>    |            |            |               |     |           |     |           |        |
| ≤ 3                             | 492        | 365        | (74.2)        | 1.0 |           | 1.0 |           |        |
| 4-7                             | 77         | 55         | (71.4)        | 1.0 | (0.8-1.1) | 1.0 | (0.8-1.1) | 0.521  |
| 8-28                            | 103        | 76         | (73.8)        | 1.0 | (0.9-1.1) | 1.0 | (0.8-1.1) | 0.506  |
| <b>Gender</b>                   |            |            |               |     |           |     |           |        |
| Male                            | 392        | 285        | (72.7)        | 1.0 |           |     |           |        |
| Female                          | 280        | 211        | (75.4)        | 1.0 | (0.9-1.1) |     |           |        |
| <b>Hospital admitted</b>        |            |            |               |     |           |     |           |        |
| YCH                             | 413        | 327        | (79.2)        | 1.2 | (1.1-1.3) | 1.2 | (1.1-1.4) | <0.001 |
| CWH                             | 259        | 169        | (65.3)        | 1.0 |           | 1.0 |           |        |
| <b>Year of admission</b>        |            |            |               |     |           |     |           |        |
| 2017                            | 295        | 195        | (66.1)        | 1.0 |           | 1.0 |           |        |
| 2018                            | 245        | 194        | (79.2)        | 1.2 | (1.1-1.3) | 1.1 | (1.0-1.3) | 0.019  |
| 2019                            | 132        | 107        | (81.1)        | 1.2 | (1.1-1.4) | 1.2 | (1.1-1.3) | 0.005  |
| <b>Gestational age</b>          |            |            |               |     |           |     |           |        |
| Preterm (<37 wk )               | 392        | 293        | (74.7)        | 1.0 | (0.9-1.1) |     |           |        |
| Term (37 up to 42 wk )          | 267        | 192        | (71.9)        | 1.0 |           |     |           |        |
| Post term (>42 wk )             | 5          | 3          | (60)          | 0.8 | (0.4-1.7) |     |           |        |
| Missing                         | 8          | 8          | (100)         | -   |           |     |           |        |
| <b>PROM (&gt;18hr)</b>          |            |            |               |     |           |     |           |        |
| Yes                             | 196        | 147        | (75.0)        | 1.0 | (0.9-1.1) |     |           |        |
| No                              | 476        | 349        | (73.3)        | 1.0 |           |     |           |        |
| <b>Place of Delivery</b>        |            |            |               |     |           |     |           |        |
| Institutional                   | 584        | 427        | (73.1)        | 1.0 |           | 1.0 |           |        |
| Home                            | 88         | 69         | (78.4)        | 1.1 | (1.0-1.2) | 1.0 | (0.9-1.1) | 0.870  |
| <b>Mode of delivery</b>         |            |            |               |     |           |     |           |        |
| Normal                          | 313        | 236        | (75.4)        | 1.0 |           |     |           |        |
| Forceps/Vacuum                  | 10         | 8          | (80.0)        | 1.1 | (0.8-1.5) |     |           |        |
| Elective CS                     | 28         | 21         | (75.0)        | 1.0 | (0.8-1.2) |     |           |        |
| Emergency CS                    | 321        | 231        | (72.0)        | 1.0 | (0.9-1.0) |     |           |        |
| <b>Delivery conducted by</b>    |            |            |               |     |           |     |           |        |
| Doctor                          | 567        | 400        | (70.3)        | 1.0 | (0.9-1.1) |     |           |        |
| Others <sup>#</sup>             | 105        | 79         | (71.8)        | 1.0 |           |     |           |        |
| <b>Meconium staining liquor</b> |            |            |               |     |           |     |           |        |
| Yes                             | 61         | 44         | (72.1)        | 1.0 |           |     |           |        |
| No                              | 611        | 452        | (74.0)        | 1.0 | (0.9-1.2) |     |           |        |
| <b>Foul smelling liquor</b>     |            |            |               |     |           |     |           |        |
| Yes                             | 38         | 28         | (73.7)        | 1.0 | (0.8-1.2) |     |           |        |
| No                              | 634        | 468        | (73.8)        | 1.0 |           |     |           |        |

**Birth Asphyxia**

|         |     |     |        |     |           |     |           |       |
|---------|-----|-----|--------|-----|-----------|-----|-----------|-------|
| Yes     | 140 | 98  | (70.0) | 1.0 |           | 1.0 |           |       |
| No      | 500 | 371 | (74.2) | 1.1 | (0.9-1.2) | 1.0 | (0.9-1.2) | 0.682 |
| Missing | 32  | 27  | (84.4) | 1.2 | (1.0-1.4) | 1.0 | (0.8-1.2) | 0.06  |

**Birth weight**

|                    |     |     |        |     |           |     |           |       |
|--------------------|-----|-----|--------|-----|-----------|-----|-----------|-------|
| Very low (<1.5kg)  | 205 | 156 | (76.1) | 1.1 | (1.0-1.2) | 1.1 | (1.0-1.3) | 0.152 |
| Low (1.5 to 2.5kg) | 223 | 170 | (76.2) | 1.1 | (1.0-1.2) | 1.1 | (0.9-1.2) | 0.133 |
| Normal (>2.5kg)    | 244 | 170 | (69.7) | 1.0 |           | 1.0 |           |       |

**Hyperbilirubinemia (> 20 mg per dL)**

|     |     |     |        |     |           |     |           |       |
|-----|-----|-----|--------|-----|-----------|-----|-----------|-------|
| Yes | 368 | 265 | (72.0) | 1.0 |           | 1.0 |           |       |
| No  | 304 | 231 | (76.0) | 1.1 | (1.0-1.2) | 1.1 | (0.9-1.2) | 0.103 |

**Hypothermia (Temperature <35.5 °C)**

|     |     |     |        |     |           |     |           |       |
|-----|-----|-----|--------|-----|-----------|-----|-----------|-------|
| Yes | 120 | 103 | (85.8) | 1.2 | (1.1-1.3) | 1.0 | (0.9-1.2) | 0.492 |
| No  | 552 | 393 | (71.2) | 1.0 |           | 1.0 |           |       |

**Onset**

|       |     |     |        |     |           |  |  |  |
|-------|-----|-----|--------|-----|-----------|--|--|--|
| Early | 294 | 217 | (73.8) | 1.0 |           |  |  |  |
| Late  | 378 | 279 | (73.8) | 1.0 | (0.9-1.1) |  |  |  |

**Bacteriological isolate**

|               |     |     |        |     |           |     |           |        |
|---------------|-----|-----|--------|-----|-----------|-----|-----------|--------|
| Gram-positive | 251 | 161 | (64.1) | 1.0 |           | 1.0 |           |        |
| Gram-negative | 421 | 335 | (79.6) | 1.2 | (1.1-1.4) | 1.2 | (1.1-1.3) | <0.001 |

CDST= Culture and drug susceptibility testing; NICU= Neonatal intensive care unit; PR= Prevalence ratio; Ci= Confidence interval; PROM= Prolonged rupture of membrane; Birth Asphyxia= (For extramural/outborn babies, YCH): Slow gasping breathing at 1-minute of age and (For intramural/inborn babies, CWH): Apgar score of less than 7 at 1 minute of age; Other#= Nurse, Midwife, Traditional Birth Attendant, Skilled Birth Attendant and Self; \* Resistance to at least one first line antibiotics- ampicillin, amikacin, gentamicin and cefotaxime; # Row percentage; \$ Modified Poisson Regression.

**Table 5.** Demographic, perinatal and clinical characteristics associated with unfavourable treatment outcomes among neonates with bacteriologically confirmed sepsis admitted to the NICU of two tertiary care hospitals in Yangon, Myanmar from January 2017 to December 2019, N= 672.

| Characteristics              | Total | Unfavourable* |        | Unadjusted |           | Adjusted# |           | p Value |
|------------------------------|-------|---------------|--------|------------|-----------|-----------|-----------|---------|
|                              |       | n             | (%)*   | PR         | (95% CI)  | PR        | (95% CI)  |         |
| Total                        | 672   | 152           | (22.6) |            |           |           |           |         |
| <b>Admission age in days</b> |       |               |        |            |           |           |           |         |
| ≤ 3                          | 492   | 121           | (24.6) | 1.4        | (0.9-2.2) | 1.1       | (0.6-1.9) | 0.762   |
| 4-7                          | 77    | 13            | (16.9) | 1.0        | (0.5-1.8) | 1.0       | (0.5-1.9) | 0.960   |
| 8-28                         | 103   | 18            | (17.5) | 1.0        |           |           |           |         |
| <b>Gender</b>                |       |               |        |            |           |           |           |         |
| Male                         | 392   | 92            | (23.5) | 1.1        | (0.8-1.5) |           |           |         |
| Female                       | 280   | 60            | (21.4) | 1.0        |           |           |           |         |
| <b>Hospital admitted</b>     |       |               |        |            |           |           |           |         |
| YCH                          | 413   | 76            | (18.4) | 1.0        |           | 1.0       |           |         |
| CWH                          | 259   | 76            | (29.3) | 1.6        | (1.2-2.1) | 1.1       | (0.7-1.6) | 0.709   |
| <b>Year of admission</b>     |       |               |        |            |           |           |           |         |
| 2017                         | 295   | 66            | (22.4) | 1.3        | (0.9-2.1) | 1.4       | (0.9-2.2) | 0.095   |

|                                               |     |     |        |     |           |     |           |       |
|-----------------------------------------------|-----|-----|--------|-----|-----------|-----|-----------|-------|
| 2018                                          | 245 | 64  | (26.1) | 1.6 | (1.0-2.4) | 1.4 | (0.9-2.2) | 0.107 |
| 2019                                          | 132 | 22  | (16.7) | 1.0 |           | 1.0 |           |       |
| <b>Gestational age</b>                        |     |     |        |     |           |     |           |       |
| Preterm (<37 wk )                             | 392 | 113 | (28.8) | 2.1 | (1.5-3.0) | 1.5 | (0.9-2.6) | 0.164 |
| Term (37 up to 42 wk )                        | 267 | 36  | (13.5) | 1.0 |           | 1.0 |           |       |
| Post term (>42 wk )                           | 5   | 0   | (0.0)  | -   |           | -   |           |       |
| Missing                                       | 8   | 3   | (37.5) | 2.8 | (1.1-7.2) | 2.5 | (0.9-6.8) | 0.066 |
| <b>PROM (&gt;18hr)</b>                        |     |     |        |     |           |     |           |       |
| Yes                                           | 196 | 51  | (26.0) | 1.2 | (0.9-1.6) | 1.0 | (0.7-1.5) | 0.827 |
| No                                            | 476 | 101 | (21.2) | 1.0 |           | 1.0 |           |       |
| <b>Place of Delivery</b>                      |     |     |        |     |           |     |           |       |
| Institutional                                 | 584 | 134 | (22.9) | 1.1 | (0.7-1.7) |     |           |       |
| Home                                          | 88  | 18  | (20.5) | 1.0 |           |     |           |       |
| <b>Mode of delivery</b>                       |     |     |        |     |           |     |           |       |
| Normal                                        | 313 | 68  | (21.7) | 1.0 |           | 1.0 |           |       |
| Forceps/Vacuum                                | 10  | 1   | (10.0) | 0.5 | (0.1-3.0) | 0.8 | (0.1-5.2) | 0.831 |
| Elective CS                                   | 28  | 3   | (10.7) | 0.5 | (0.2-1.5) | 0.6 | (0.2-1.7) | 0.298 |
| Emergency CS                                  | 321 | 80  | (24.9) | 1.1 | (0.9-1.5) | 1.2 | (0.9-1.6) | 0.236 |
| <b>Delivery conducted</b>                     |     |     |        |     |           |     |           |       |
| Doctor                                        | 567 | 130 | (22.9) | 1.1 | (0.7-1.6) |     |           |       |
| Others <sup>#</sup>                           | 105 | 22  | (21.0) | 1.0 |           |     |           |       |
| <b>Meconium staining</b>                      |     |     |        |     |           |     |           |       |
| Yes                                           | 61  | 8   | (13.1) | 1.0 |           |     |           |       |
| No                                            | 611 | 144 | (23.6) | 1.8 | (0.9-3.5) | 1.4 | (0.7-2.8) | 0.305 |
| <b>Foul smelling</b>                          |     |     |        |     |           |     |           |       |
| Yes                                           | 38  | 8   | (21.1) | 0.9 | (0.5-1.7) |     |           |       |
| No                                            | 634 | 144 | (22.7) | 1.0 |           |     |           |       |
| <b>Birth Asphyxia</b>                         |     |     |        |     |           |     |           |       |
| Yes                                           | 140 | 35  | (25.0) | 1.1 | (0.8-1.6) |     |           |       |
| No                                            | 500 | 109 | (21.8) | 1.0 |           |     |           |       |
| Missing                                       | 32  | 8   | (25.0) | 1.1 | (0.6-2.1) |     |           |       |
| <b>Birth weight</b>                           |     |     |        |     |           |     |           |       |
| Very low (<1.5kg)                             | 205 | 68  | (33.2) | 2.4 | (1.6-3.4) | 1.5 | (0.9-2.6) | 0.130 |
| Low (1.5kg to 2.5kg)                          | 223 | 50  | (22.4) | 1.6 | (1.1-2.4) | 1.1 | (0.7-1.9) | 0.675 |
| Normal (>2.5kg)                               | 244 | 34  | (13.9) | 1.0 |           | 1.0 |           |       |
| <b>Hyperbilirubinemia (&gt; 20 mg per dL)</b> |     |     |        |     |           |     |           |       |
| Yes                                           | 368 | 78  | (21.2) | 0.9 | (0.7-1.2) |     |           |       |
| No                                            | 304 | 74  | (24.3) | 1.0 |           |     |           |       |
| <b>Hypothermia (Temperature &lt;35.5 °C)</b>  |     |     |        |     |           |     |           |       |
| Yes                                           | 120 | 18  | (15.0) | 0.6 | (0.4-1.0) | 0.6 | (0.3-0.9) | 0.029 |
| No                                            | 552 | 134 | (24.3) | 1.0 |           | 1.0 |           |       |

**Bacteriological isolate**

|                |     |     |        |     |           |     |           |       |
|----------------|-----|-----|--------|-----|-----------|-----|-----------|-------|
| Gram-positive  | 251 | 43  | (17.1) | 1.0 |           | 1.0 |           |       |
| Gram- negative | 421 | 109 | (25.9) | 1.5 | (1.1-2.1) | 1.1 | (0.8-1.6) | 0.505 |

**Onset**

|       |     |    |        |     |           |     |           |      |
|-------|-----|----|--------|-----|-----------|-----|-----------|------|
| Early | 294 | 60 | (20.4) | 1.0 |           | 1.0 |           |      |
| Late  | 378 | 92 | (24.3) | 1.2 | (0.9-1.6) | 1.1 | (0.8-1.5) | 0.46 |

**Resistance<sup>\$</sup>**

|     |     |     |        |     |           |     |           |       |
|-----|-----|-----|--------|-----|-----------|-----|-----------|-------|
| Yes | 496 | 119 | (24.0) | 1.3 | (0.9-1.8) | 1.3 | (1.0-1.9) | 0.094 |
| No  | 176 | 33  | (18.8) | 1.0 |           | 1.0 |           |       |

---

CDST= Culture and drug susceptibility testing; NICU= Neonatal intensive care unit; PR= Prevalence ratio; CI= Confidence interval; PROM= Prolonged rupture of membrane; Birth Asphyxia= (For extramural/out born babies, YCH): Slow gasping breathing at 1-minute of age and (For intramural/inborn babies, CWH): Apgar score of less than 7 at 1 minute of age; Other<sup>†</sup>= Nurse, Midwife, Traditional Birth Attendant, Skilled Birth Attendant and Self; \* Unfavourable-Died, Left Against Medical Advice, Discharge on Request, Referred out; # Modified Poisson Regression; \$ First line antibiotics- ampicillin, amikacin, gentamicin and cefotaxime.
